# Supplementary material for: LIM Domain Only-2 (LMO2) Induces T-Cell Leukemia by Two Distinct Pathways
Source: PubMed Central journal article supplement (PMC3897537; doi:10.1371/journal.pone.0085883), 2014-01-21
Supplement: pone.0085883.s001.pdf [file pone.0085883.s001.pdf]

## **SUPPLEMENTAL METHODS AND FIGURES**

### **Patient samples, qRT-PCR, and gene expression analysis**

Primary human T-ALL samples were provided de-identified by the Childrens Oncology Group (COG), and from tissue banks at Vanderbilt and St. Jude. Cells were stored in liquid nitrogen and rapidly thawed at 37°C and transferred to pre-warmed complete media (RPMI 1640, 10% FBS, 1% Penn/Strap). Two hours later, we added 1 ml Tri-Reagent and stored at -80°C for RNA, gDNA & Protein isolation. RNA, DNA & Protein were isolated from 23 human patient T-ALLs and 4 T-ALL cell lines Tall104, Loucy, Jurkat, JM using Ambion TRI-Reagent Cat # AM97JB as per company protocol. The RNA samples were quantified in 10 mM Tris-HCl on the Nanodrop ND-1000. Samples were then analyzed for quality using an Agilent 2100 Bioanalyzer. Samples set up for reverse transcription in duplicate with random hexamer primer and Invitrogen's Superscript II. Reactions were pooled for clean up using Qiagen PCR purification kit (#28104). Real Time PCR reactions were done in triplicates. Microarray data were normalized using the Robust MultiChip Averaging (RMA) algorithm<sup>1</sup> as implemented in the Bioconductor package *Affy*. For pairwise group comparisons, we used t-test in the *Limma* package<sup>2</sup> in Bioconductor to identify differentially expressed probe sets between the *LMO2*-high expression and -low expression groups under comparison. The implementation of t-test in *Limma* uses an empirical Bayes method to moderate the standard errors of the estimated log-fold changes. A false discovery rate of 0.01 was used as a cut-off to identify 130 significant probes for *LMO2* and 122 probes for *HHEX* comparisons. The hierarchical clustering with complete linkage and Euclidean distance was applied to generate the heatmaps shown for identified probes.

### ***Notch1* mutational analysis**

We used heteroduplex analysis as previously described<sup>3</sup> and direct Sanger sequencing to identify mutations in exons 26, 27, and 34 of the murine *Notch1* gene. Genomic DNA was extracted from T-

ALLs by homogenization and the Promega SV Genomic Purification Kit (Cat # A2360). Notch1 mouse Exons 26, 27, and 34 were PCR amplified using primer pairs in Table S2. Direct Sanger Sequencing was performed on PCR products by the Vanderbilt Core Sequencing Facility. Mutations were analyzed using Invitrogen Vector NTI Version 11.0 and novoSNP, using ABI trace files as input <sup>4</sup>. The analysis was conducted using the lowest possible SNP detection threshold (Score =1, FScore = 1), which is intended to minimize false negatives. Additionally, all traces, as aligned by novoSNP, were analyzed manually.

### **Nuclear Extracts and gel shift assay**

Our extraction protocol is modified from the original Dignam et al method <sup>5</sup>. Cells ( $5 \times 10^7$ ) were washed twice with 10 ml of cold PBS, resuspended in 5 packed cell volumes of buffer A (10 mM HEPES, 1.5 mM MgCl<sub>2</sub>, 10 mM KCl, 50 mM sucrose, 0.1% NP-40, 0.5 mM DTT, 0.5 mM PMSF, pH 7.9) and incubated on ice for 10 min. The nuclei were pelleted by centrifugation at 1000 *g* for 5 min, and resuspended in 2 packed nuclear volumes of buffer C (20 mM HEPES, 1.5 mM MgCl<sub>2</sub>, 420 mM KCl, 0.2 mM EDTA, 25% v/v glycerol, 0.5 mM DTT, 0.5 mM PMSF, pH 7.9). The resulting nuclear suspension was rocked at 4° C for 2 h. The sample was centrifuged at 13 000 *g* for 10 min, and aliquots of the nuclear extract were frozen immediately on dry ice. Samples were stored at -80° C. The protein concentration of the nuclear extract was determined by the Bradford assay (BioRad). EMSAs were performed with <sup>32</sup>P-labelled double-stranded oligonucleotides as described <sup>6</sup>. The sequence of the sense strands of individual oligonucleotides is as follows:

E-Ebox, AGCCGACCATCTGTTCAGGTAACAGATGGTCGACA

E-EΔ, AGCCGACCATCTGTTCAGGTAACCGATCGTCGACA

LOUCY nuclear extract (5 mg) was incubated for 20 min at 25° C in binding buffer (25 mM HEPES, 100 mM KCl, 0.6 mM EDTA, 10% v/v glycerol, 2.8 mM DTT, pH 7.9) in the presence of 3 mg/ml poly(dI-dC) and 20 nM <sup>32</sup>P-labelled oligonucleotide with or without antibodies: anti-LMO2 mouse monoclonal (kindly provided by Dr. Ron Levy, Stanford); anti-LDB1 from Santa Cruz (sc-11198), anti-LYL1 from Santa Cruz (sc-46158), anti-E47 from Santa Cruz (sc-763). Samples were loaded onto 6% native polyacrylamide gels, which were run for 12 h at 11 mA constant current in TGE running buffer (50 mM Tris HCl, 380 mM glycine, 2 mM EDTA). After drying the gel, the DNA–protein complexes were visualized by autoradiography.

### **Chromatin Immunoprecipitation analysis**

LOUCY cells ( $5 \times 10^6$  per antisera used) were washed once in PBS and cross linked with 2% formaldehyde for 5 min at 37°C followed by quenching with 10% glycine for 10 minutes at 37°C. Lysate was prepared by suspending the cells in lysis buffer (50 mM HEPES (pH 7.8), 140 mM NaCl, 1 mM EDTA, 1% Triton X-100, 0.1% sodium deoxycholate, and a mixture of protease inhibitors (Roche). Lysate was sonicated with 2x5-sec pulses at 4 watts with a 20 s refractory period in between the sonications, to reduce the chromatin fragments to ~ 500bp. Clarified lysates were pre-cleared with Protein A-agarose (Santa Cruz Biotechnology Inc.) for 30 min and immunoprecipitated with 5 µg of the indicated antisera (same as for EMSA). Following incubation with protein A-agarose (30 min), immune complexes were washed once with low salt (20 mM Tris HCl, 150 mM NaCl, 1% Triton X-100, 2 mM EDTA, pH 8.1), high salt (20 mM Tris HCl, 500 mM NaCl, 1% Triton X-100, 2 mM EDTA, pH 8.1), and LiCl immune complex wash buffer (10 mM Tris HCl, 250 mM LiCl, 0.5% NP-40, 0.5% sodium deoxycholate, pH 8.1), and eluted with 400 µl elution buffer (1% SDS, 0.1M NaHCO<sub>3</sub>). Cross links were reversed with 5M NaCl at 60°C, DNA was recovered by ethanol precipitation, the mixture treated with

proteinase K digestion, and the DNA was purified using a PCR purification kit (Qiagen), and analyzed by real time PCR (BioRad).

### **Cell culture and knockdown**

The human K562 (CCL-243), Jurkats, Tall-104 (CRL-11386) & Loucy (CRL-2629) cells were obtained from the American Type Culture Collection. The Loucy and Jurkat cells were grown in RPMI-1640 medium and K562 were grown in IMDM containing 10% fetal bovine serum, 1% Penn/Strep, in a humidified atmosphere of 5% CO<sub>2</sub> in air at 37°C, in T25 or T75 flasks. Knockdown of LMO2 was done by electroporation of a pGIPZ construct expressing a specific shRNA (i.e. LMO2, cat# V2LHS\_62634) or non-silencing control into LOUCY cells using manufacturer's conditions (Lonza). We electroporated 2x10<sup>6</sup> Loucy cells with 5 µg of pGIPZ DNA in solution V, kit VCA-1003. We added 50 µL of complete growth media to the cuvettes and transferred the cells to a 12 well plate with 1ml prewarmed media per well. Cells were then sorted for GFP positivity and counted for viability or whole lysate prepared using RIPA buffer (2mM EDTA, 150mM NaCl, 1% NP-40, 0.5% Sodium Deoxycholate, 0.1% SDS, 50mM HEPES buffer pH 7.4, 1 mM DTT, 1 tablet of Roche complete mini protease inhibitor ref # 05892970001) for Western blot.

### **Luciferase reporter constructs**

First, we PCR amplified a 4 kb fragment using mouse spleen cDNA as template and Expand Long Template kit (Roche Applied Science). Forward primer sequence included a *KpnI* site 5' of 1 kb of the Hhex promoter: 5'- GGTACCTTATTCTGAAAGATGTCCGTGACTCC-3'. Reverse primer included part of exon 2 followed by *HindIII* site: 5'- CGAAGCTTGGTATTTCTGAGTCTCGAACTTCTTCTCCAGCTC-3'. This 4 kb fragment was TA-cloned into pGEMTEasy and completely sequence verified and designated pGEMTEasy-Hhex. We used this plasmid to create pHhex-enh-SV40 and pG-Hhex-luc. For pHhex-enh-SV40, we cut out a 1.2 kb fragment of Hhex intron 1 that included the 409 bp enhancer with

*MluI* and *XhoI* and cloned it into pGL3 double digested with same enzymes. To construct pG-Hhex-luc, we removed the luciferase cDNA and SV40 poly(A) signal from pGL3-basic using *XhoI/SaII* and cloned it into the *SaII* digested pGEMTEasy-Hhex construct noted above. Thus, the luciferase cDNA was positioned immediately 3' of a partial Hhex exon 2. This was designated pG-Hhex-luc which served as template for enhancer deletions.

### **Luciferase reporter assays**

Jurkat and K562 cells were transfected using Lipofectamine 2000 transfection reagent (Life Technologies, cat # 11668-019) using manufacturer's protocols; in a 6-well plate, we transfected 300 ng of the reporter DNA pG-*Hhex*-luc per dish in a 6 well plate in triplicate along with pCMV-*Renilla* 25 ng and 5 ng for Jurkats & K562 respectively. For Loucy cells, we electroporated  $2 \times 10^6$  cells in triplicate using Lonza nucleofector technology with solution V, kit VCA-1003. We transfected 300 ng of pG-*Hhex*-luc & 25 ng pCMV-*Renilla* and immediately added 50  $\mu$ L of complete growth medium to the cuvettes and transferred the cells to a 12 well plate with pre-warmed media. After 48 h, cells were washed, lysed in passive lysis buffer (Promega), and activity determined using Dual-Luciferase Reporter Assay System (cat # E1910) according to the manufacturer's instructions.

### **Fluorescent in situ hybridization**

LMO2 BAC (2533C16) and MEF2C BAC (RP11690G22) were purified using Qiagen maxiprep Kit (Cat # 12163), as per the manufacturer's protocol. We labeled 1  $\mu$ g of each BAC with Spectrum Green dUTP or with Spectrum Orange dUTP using the Vysis Nick Translation Kit (Cat # 32-801300). Cytospins of primary human T-ALL cells from case 05-101 were prepared at 800rpm for 5 min and fixed in 3:1 glacial acetic acid and methanol for 20 min, dehydrated stepwise in 70%, 85% and 100% ethanol for 2 min each, then air dried. For probe precipitation, we added 5  $\mu$ l of each of the labeled BACs, 10  $\mu$ l of human Cot-1 DNA (Invitrogen Cat # 15279-101), 1/10<sup>th</sup> volume of 3M Sodium acetate and 2.5x

volume of 100% Ethanol and incubated at -80°C for 30 min. The pellet was spun at 15K for 20 min at 4 °C; supernatant discarded. DNA pellet was washed with 500ul 70% EtOH and resuspended in 10 µl Hybridization buffer (Vysis Cat # 32-131018), then, incubated 1 h in dark at 37°C. We applied 10 µl of labeled probe to each slide including control metaphase slide in the Vysis Hybrite for 73°C 6min, then at 37°C overnight. Slides were washed in SSC and detergent, air dried, and treated with 10 µl of DAPII (Vysis Cat #32-804831) counter stain.

### ***Hhex* conditional knockouts**

The floxed *Hhex* mice will be described in detail elsewhere. Briefly, the murine *Hhex* gene was cloned from a 129 BAC by retrieval methods previously described<sup>7</sup>. A single *loxP* and a *loxP* plus *Frt*-flanked neo cassette were targeted to the resulting construct in two steps in EL350 cells through recombineering. First, to insert the single 5' *loxP* site, a targeting cassette containing *Pgk-em7-neo* flanked by homology arms to 1<sup>st</sup> intron of *Hhex* was constructed in PL400. The homology arms are PCR amplified using the following primers: 5'-arm sense, 5'- CGC GAA GCT TGC AGA ACA TGA GTG TGA CCG-3'; 5'-arm antisense, 5'- CGC GGA ATT CAT GAG AGC ACT TCC CAA GGC-3'; 3'-arm sense, 5'- CGC GCT CGA GAA AGA GCG CAC CCT GAG TCT -3'; 3'-arm antisense, 5'- CGC GGG ATC CCC AGA ACG CAA CCA TGT TCC -3'. The homology arms were sequence verified, restriction digested, and cloned into PL400 via four-way ligation. The targeting cassette was released by *Bam*HI/*Hind*III double digest and targeted through co-electroporation into heat shock-induced EL350 cells. The *Pgk-em7-neo* sequence was then removed by electroporation into arabinose-induced Cre-expressing EL350 cells, leaving behind a single *loxP* site. To insert the second *loxP* site after exon 4 of *Hhex*, a targeting cassette containing *frt-Pgk-Em7-neo-frt-loxP* flanked by homology arms to targeting site was constructed in PL451. Homology arms were amplified using the following primers: 5'-arm sense, 5'- CGC GAA GCT TCC TAA ACA TGA CAC CTA AAG -3'; 5'-arm antisense, 5'- CGC GGA

ATT CCA CCC TGC TTG GTC CTC TTC-3'; 3'-arm sense, 5'- CGC GGG ATC CGA TTG GAG CTG  
CCA CTG AGT -3'; 3'-arm antisense, 5'- CGC GGC GGC CGC AGC AGC TGG AAC CTG ACA AC -3'.  
The targeting cassette was released by *NotI/HindIII* double digest and targeted similarly as described  
above. The conditional targeting vector was then linearized by *NotI* digestion and electroporated into  
129-derived CJ7 embryonic stem (ES) cells, using standard procedures. G418 (180 µg/ml) and  
ganciclovir (2 µm) double-resistant clones were analyzed by Southern blotting hybridization, using both  
5' and 3' external probes. External probes were PCR amplified using the following primers: 5' probe,  
sense, 5'- CCC CAC TAC ACC TGG CTA AC -3'; 5' probe, antisense, 5'- ACG TGG ATG GTA TCA  
AAG CC -3'; 3'-probe, sense, 5'- GGG ATT TGT TGT TGC TGT GC-3'; 3'-probe, antisense, 5'- CTG  
GAT GCT GGT GAC TCA GA -3'. Correctly targeted clones were then injected into C57BL/6  
blastocysts using standard procedures, and resulting chimeras were mated with C57BL/6 females to  
obtain germline transmission of the targeted allele. The Neo cassette was removed by crossing to the  
*Flp* recombinase strain.

**Table S1. Taqman probes used for qRT-PCR.**

**Table S2. Primers used for *Notch1* mutational analysis.** Notch1 exons 26, 27, and 34 were amplified using the primers shown.

**Table S3. Summary of *Notch1* mutational analysis.** *CD2-Lmo2* transgenic T-ALLs were analyzed for *Notch1* mutations by heteroduplex analysis and direct Sanger sequencing. Mutations were found in all the tumors by these methods, most commonly insertions and deletions in exon 34 that were predicted to disrupt the PEST degradation signaling<sup>8</sup>.

**Table S4. List of primers used in ChIP assay.**

**Figure S1. Supervised clustering of human T-ALL based on *LMO2*.** The Limma package was used to perform clustering analysis based on *LMO2* expression, high versus low, with the cutoff being the median expression value. The boxed areas show the probes for *LYL1* and *HHEX*. The black arrows denote cases of ETP-ALL. Color denotes the raw z score for expression.

**Figure S2. Supervised clustering of human T-ALL based on *HHEX*.** The Limma package was used to perform clustering analysis based on *HHEX* expression, high versus low, with the cutoff being the median expression value. Color denotes the raw z score for expression.

**Figure S3. Concordant expression of *HHEX*, *LMO2*, and *MEF2C* in primary T-ALLs. (A)** Bar graph shows relative expression of *HHEX* (blue), *MEF2C* (red), and *LMO2* (green) in 23 primary T-ALL samples and 3 cell lines by qRT-PCR using Taqman probes. We analyzed the primary T-ALL samples



by fluorescent *in situ* hybridization (FISH) using labeled BACs but did not find amplification of *HHEX* or *MEF2C* that may account for overexpression. However, 05-101, a case of T-ALL with normal cytogenetics showed evidence for *LMO2* duplication. This T-ALL case had the highest levels of *HHEX*, *MEF2C*, and *LMO2* mRNA by qRT-PCR. **(B)** top panel shows a normal lymphocyte probed with a labeled BAC for *LMO2* and *MEF2C* (spectrum orange); bottom panel shows an interphase FISH of T-ALL 05-101 which had very high levels of all three genes. Red (control) probe showed two signals in all cells whereas *LMO2* probe showed multiple green cells in all leukemic cells consistent with duplication of the gene.

**Figure S4. Survival analysis differs among *CD2-Lmo2* transcriptional profiles.** We divided the mice developing T-ALL based on their median values of *Hhex* or *Dtx1* mRNA by qRT-PCR. **(A)** shows survival analysis between two cohorts of mice, those with *Hhex* expression (dark gray, n=11) and those without *Hhex* expression (light gray, n=12). **(B)** shows survival analysis based on the expression of *Dtx1*-high (n=12) versus *Dtx1*-low (n=7). Log-rank analysis was used to generate the *P* values shown.

**Figure S5. Crossing *CD2-Lmo2* transgenics onto B6 increases T-ALL latency.** All mice from the cohorts shown in Figure 7 were backcrossed to C57BL6 for more than 10 generations which increased T-ALL latency but did not affect penetrance. *CD2-Lmo2* transgenic mice were grouped according to the number of backcrosses to C57Bl6 mice. Thirteen mice at N8-N11 were compared to 32 mice at N2-N4 for onset of T-ALL. Survival analysis is shown and the curves were compared by Log-rank analysis which showed a statistically significant difference in survival, *P*=.04. Median survival for N8-N11 was 255 days and 213 days for N2-N4.

**Figure S6. *Hhex* conditional knockout alleles.** Schematic shows the wild type *Hhex* gene with 4 exons shown in blue. The description of the targeting vector is provided above and the resulting

targeted allele in ES cells is shown. The ES cells were used to make chimeric mice which were then bred to *Flp* recombinase mice to delete the neomycin cassette resulting in the conditional floxed allele. These mice were backcrossed to B6 and intercrossed to create *lox/lox* homozygous mice. These were bred to *Vav-iCre* transgenic mice to effect conditional inactivation of *Hhex*.

**Figure S7. Enhancer constructs analyzed in paper.** The intronic 400 bp enhancer in intron 1 of mouse *Hhex* is shown. The deletion constructs, clones (cl.1-6) transfected in our paper were 50-100 bp deletions from the 5' end of the enhancer as shown. Motifs for specific transcription factor binding sites are shaded and GATA sites are numbered.

**Figure S8. ChIP-seq data from CCRF-CEM cells.** We mapped the sequence data from anti-LMO2 and anti-TAL1 ChIPs published by Look and colleagues from the T-ALL cell line. These cells express HHEX. In addition to LMO2 and 2 TAL1 ChIP-seq tracks, whole cell extract (WCE), and GATA3 ChIP-seq datasets were also mapped to the human genome (hg18). The black peaks correspond to enriched sequence tags. The red box shows the *HHEX* intron 1 enhancer. The data suggest specific co-occupancy of LMO2 and TAL1 at the *HHEX* enhancer. LMO2 shows occupancy at the *HHEX* promoter as well.

**Table S1. Taqman probes used for qRT-PCR.**

| Assay ID            | Target mRNA              | Refseq                     |
|---------------------|--------------------------|----------------------------|
| Mm00456428_m1       | <i>Adam17</i> ,mCG8913   | NM_009615.5                |
| Mm00494449_m1       | <i>Cdkn2a</i> ,mCG123699 | NM_001040654.1 NM_009877.2 |
| Mm00492297_m1       | <i>Dtx1</i> ,mCG131634   | NM_008052.2                |
| Mm00468977_m1       | <i>Ets2</i> ,mCG2219     | NM_011809.2                |
| Mm00484682_g1       | <i>Gata1</i> ,mCG3964    | NM_008089.1                |
| Mm00492302_g1       | <i>Gata2</i> ,mCG130615  | NM_008090.3                |
| Mm01337569_m1       | <i>Gata3</i> ,mCG5026    | NM_008091.2                |
| Mm01342805_m1       | <i>Hes1</i> ,mCG126604   | NM_008235.2                |
| Mm00439311_g1       | <i>Hes5</i> ,mCG3930     | NM_010419.2                |
| Mm00516558_m1       | <i>Heyl</i> ,mCG5537     | NM_013905.2                |
| Mm00433954_m1       | <i>Hhex</i>              | NM_008245.3                |
| Mm01340214_m1       | <i>Il2ra</i> ,mCG9569    | NM_008367.2                |
| Mm01281681_m1       | <i>Lmo2</i> ,mCG9639     | NM_008505.3                |
| Mm00493219_m1       | <i>Lyl1</i> ,mCG5919     | NM_008535.1                |
| Mm00600423_m1       | <i>Mef2c</i> ,mCG130733  | NM_025282.1                |
| Mm00487803_m1       | <i>Myc</i> ,mCG1625      | NM_010849.4                |
| Mm00476449_m1       | <i>Mycn</i> ,mCG129638   | NM_008709.2                |
| Mm00435248_m1       | <i>Notch1</i> ,mCG11364  | NM_008714.2                |
| Mm01210556_m1       | <i>Olig2</i> ,mCG11445   | NM_016967.2                |
| Mm02525085_s1       | <i>Olig3</i> ,mCG54581   | NM_053008.2                |
| Mm00478361_m1       | <i>Ptcra</i> ,mCG2682    | NM_011195.1                |
| Mm00441144_g1       | <i>Rorc</i> ,mCG5011     | NM_011281.1                |
| Mm01270606_m1       | <i>Sfpi1</i> ,mCG13483   | NM_011355.1                |
| Mm01187033_m1       | <i>Tal1</i> ,mCG16164    | NM_011527.1                |
| Mm00447439_s1       | <i>Tal2</i> ,mCG2742     | NM_009317.2                |
| Mm00441699_m1       | <i>Tcf12</i> ,mCG16396   | NM_011544.1                |
| Mm01175588_m1       | <i>Tcf2a</i> ,mCG145500  | NM_011548.3                |
| <b>Human probes</b> |                          |                            |
| Hs00277106_m1       | <i>LMO2</i> ,hCG26502    | NM_005574.2                |
| Hs01554603_m1       | <i>MEF2C</i> ,hCG36839   | NM_002397.2                |
| Hs01074519_m1       | <i>HHEX</i> ,hCG1781169  | NM_002729.2                |

**Table S2. Primer pairs used to amplify *Notch1* exons for mutational analysis.** M13 tags (uppercase) were introduced to facilitate sequencing.

| Target  | Forward                                    | Reverse                                |
|---------|--------------------------------------------|----------------------------------------|
| Exon 26 | GTTTTCCCAGTCACGACCaattctatccctgccatt       | CAGGAAACAGCTATGACcggtaatactacctcccctga |
| Exon 27 | GTTTTCCCAGTCACGACtaaggaaaaggggtgctgt<br>g  | CAGGAAACAGCTATGACtgcagaggtcagaaagtgtg  |
| Exon 34 | CCCCCAGGCCATCCATCATCAA                     | CAGGAAACAGCTATGACCCGGCTACCTCCAGCCAGTGC |
| Exon 34 | GTT TTCCCAGTCACGACGCTTGTGGTA<br>GCAAGGAAGC | CAGGAAACAGCTATGACACTGAGGTGTGGCTGTGATG  |
| Exon 34 | TGTA AACGACGGCCAGTATAGCATGATGG<br>GGCCACTA | CAGGAAACAGCTATGACACTGGAAAGGACTCCCAACA  |

**Table S3. Summary of *Notch1* mutational analysis.** We found evidence for mutations in all the T-ALLs analyzed. The cloned or characterized mutations are shown in the table below. Blank cells indicate that the mutations were found by heteroduplex analysis but were not further characterized by sequencing.

| tumor name | Hhex expression | Notch1 mutation | exon 26 | exon 27                | exon 34                              |
|------------|-----------------|-----------------|---------|------------------------|--------------------------------------|
| 31001      | +               | +               |         |                        | uncharacterized mutation by duplex   |
| 30870      | +               | +               | wt      | wt                     | c.7624_7625insCC; fs stop at T2458   |
| 03007      |                 | +               |         |                        | wt                                   |
| 30840      | +               | +               | wt      | wt                     | c7347_7348insCT; fs stop at 2397     |
| 30831      | +               | +               |         |                        |                                      |
| 30823      | +               | +               | wt      | wt                     | c.7420_7421insG; fs stop at 2491     |
| 30839      | +               | +               |         |                        | uncharacterized mutation by duplex   |
| 30844      | +               | +               | wt      | wt                     | c.7348_7349insAGGGG; fs stop at 2398 |
| 31003      | +               | +               |         |                        |                                      |
| 30847      | +               | +               |         |                        | uncharacterized mutation by duplex   |
| 30991      |                 | +               | wt      | wt                     | c.7347_7348insC; fs stop at 2491     |
| 30832      | +               | +               |         |                        | uncharacterized mutation by duplex   |
| 30843      |                 | +               | wt      | c.G5052GGG, pQ1684insG | c.7347_7348insCCCT; fs stop at 2492  |
| 30818      |                 | +               | wt      | c.T5009A, p.I1670N     | c.7347_7348insC; fs stop at 2491     |
| 30819      |                 | +               |         |                        |                                      |
| 30982      |                 | +               | wt      | wt (duplex)            |                                      |
| 31388      |                 | +               | wt      | wt                     | c.7317_7318insG; fs stop at 2491     |
| 30830      |                 | +               | wt      | c.T5009A, p.I1670N     | c.7347_7348insT; fs stop at 2491     |
| 31416      |                 | +               |         | wt                     | wt by duplex                         |
| 30846      |                 | +               |         | wt                     | wt by duplex                         |
| 32010      |                 | +               | wt      | wt                     | c.7624_7625insCC; fs stop at 2458    |
| 31647      |                 | +               |         |                        | uncharacterized mutation by duplex   |
| 03020      |                 | +               |         |                        | c.7458_7459insA; fs stop at 2398     |
| 31415      |                 | +               | wt      | wt (duplex)            | wt                                   |
| 32080      |                 | +               |         |                        | c.7459_7480ins 64 bp duplication     |
| 03027      |                 | +               |         |                        | c.T7085A;p.L2362Q,                   |

**Table S4. Primers used for ChIP assay.**

| <b>Name</b>            | <b>sequence</b>                |
|------------------------|--------------------------------|
| HHEX promoter, forward | AGAATCCAGTTAATTGGGATGATATGAGGC |
| HHEX promoter, reverse | CCACTTTGAATATAACAATTCGTGAGTCCA |
| HHEX enhancer, forward | TACGGGGCTGGACCTGGTTCAA         |
| HHEX enhancer, reverse | CGGCTATCAGAAGTCGAGTGTTTCCT     |
| HHEX exon 4, forward   | AGTACCTGTTTGACCAAGGTGTTAAGGGGA |
| HHEX exon 4, reverse   | CACGGACGGCTTTATTTTATAGTCAAGTTA |

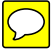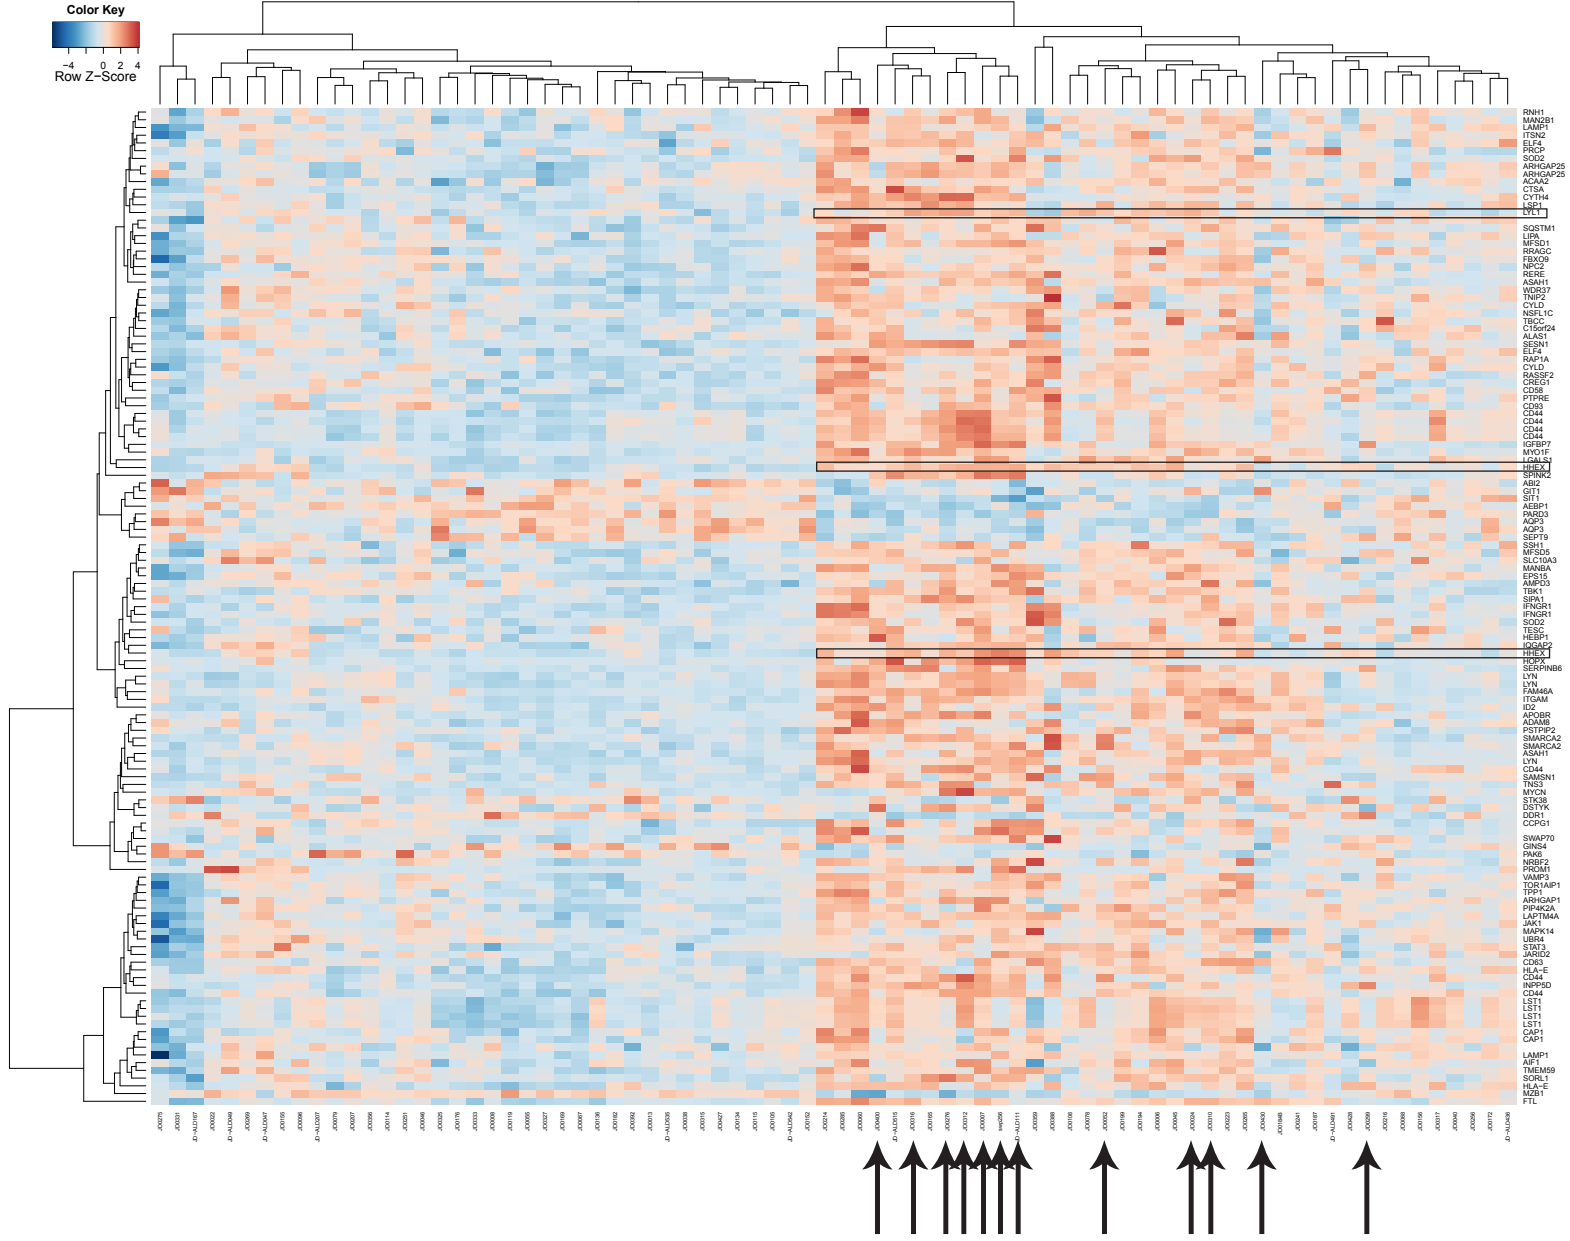

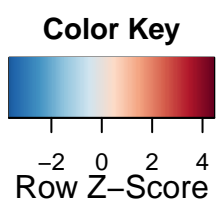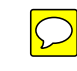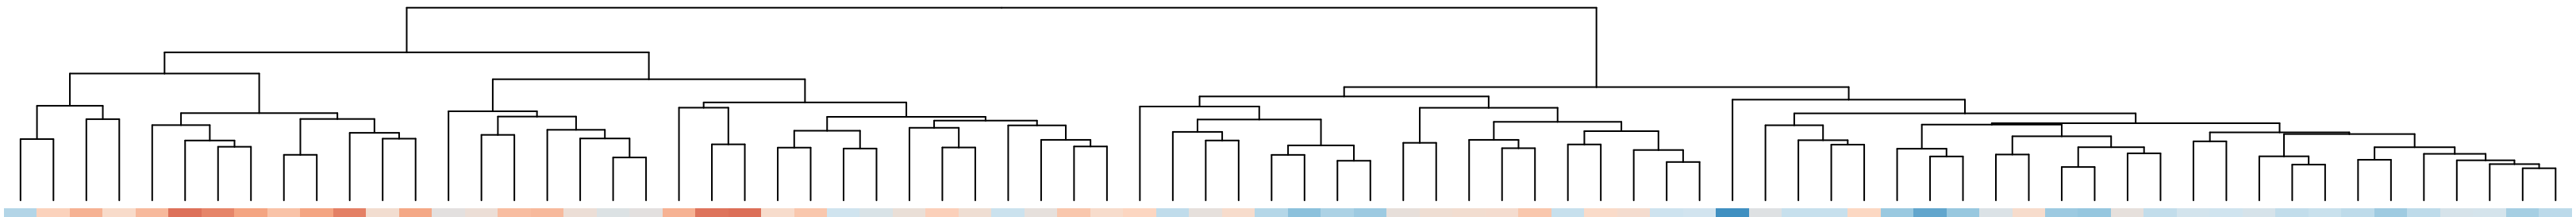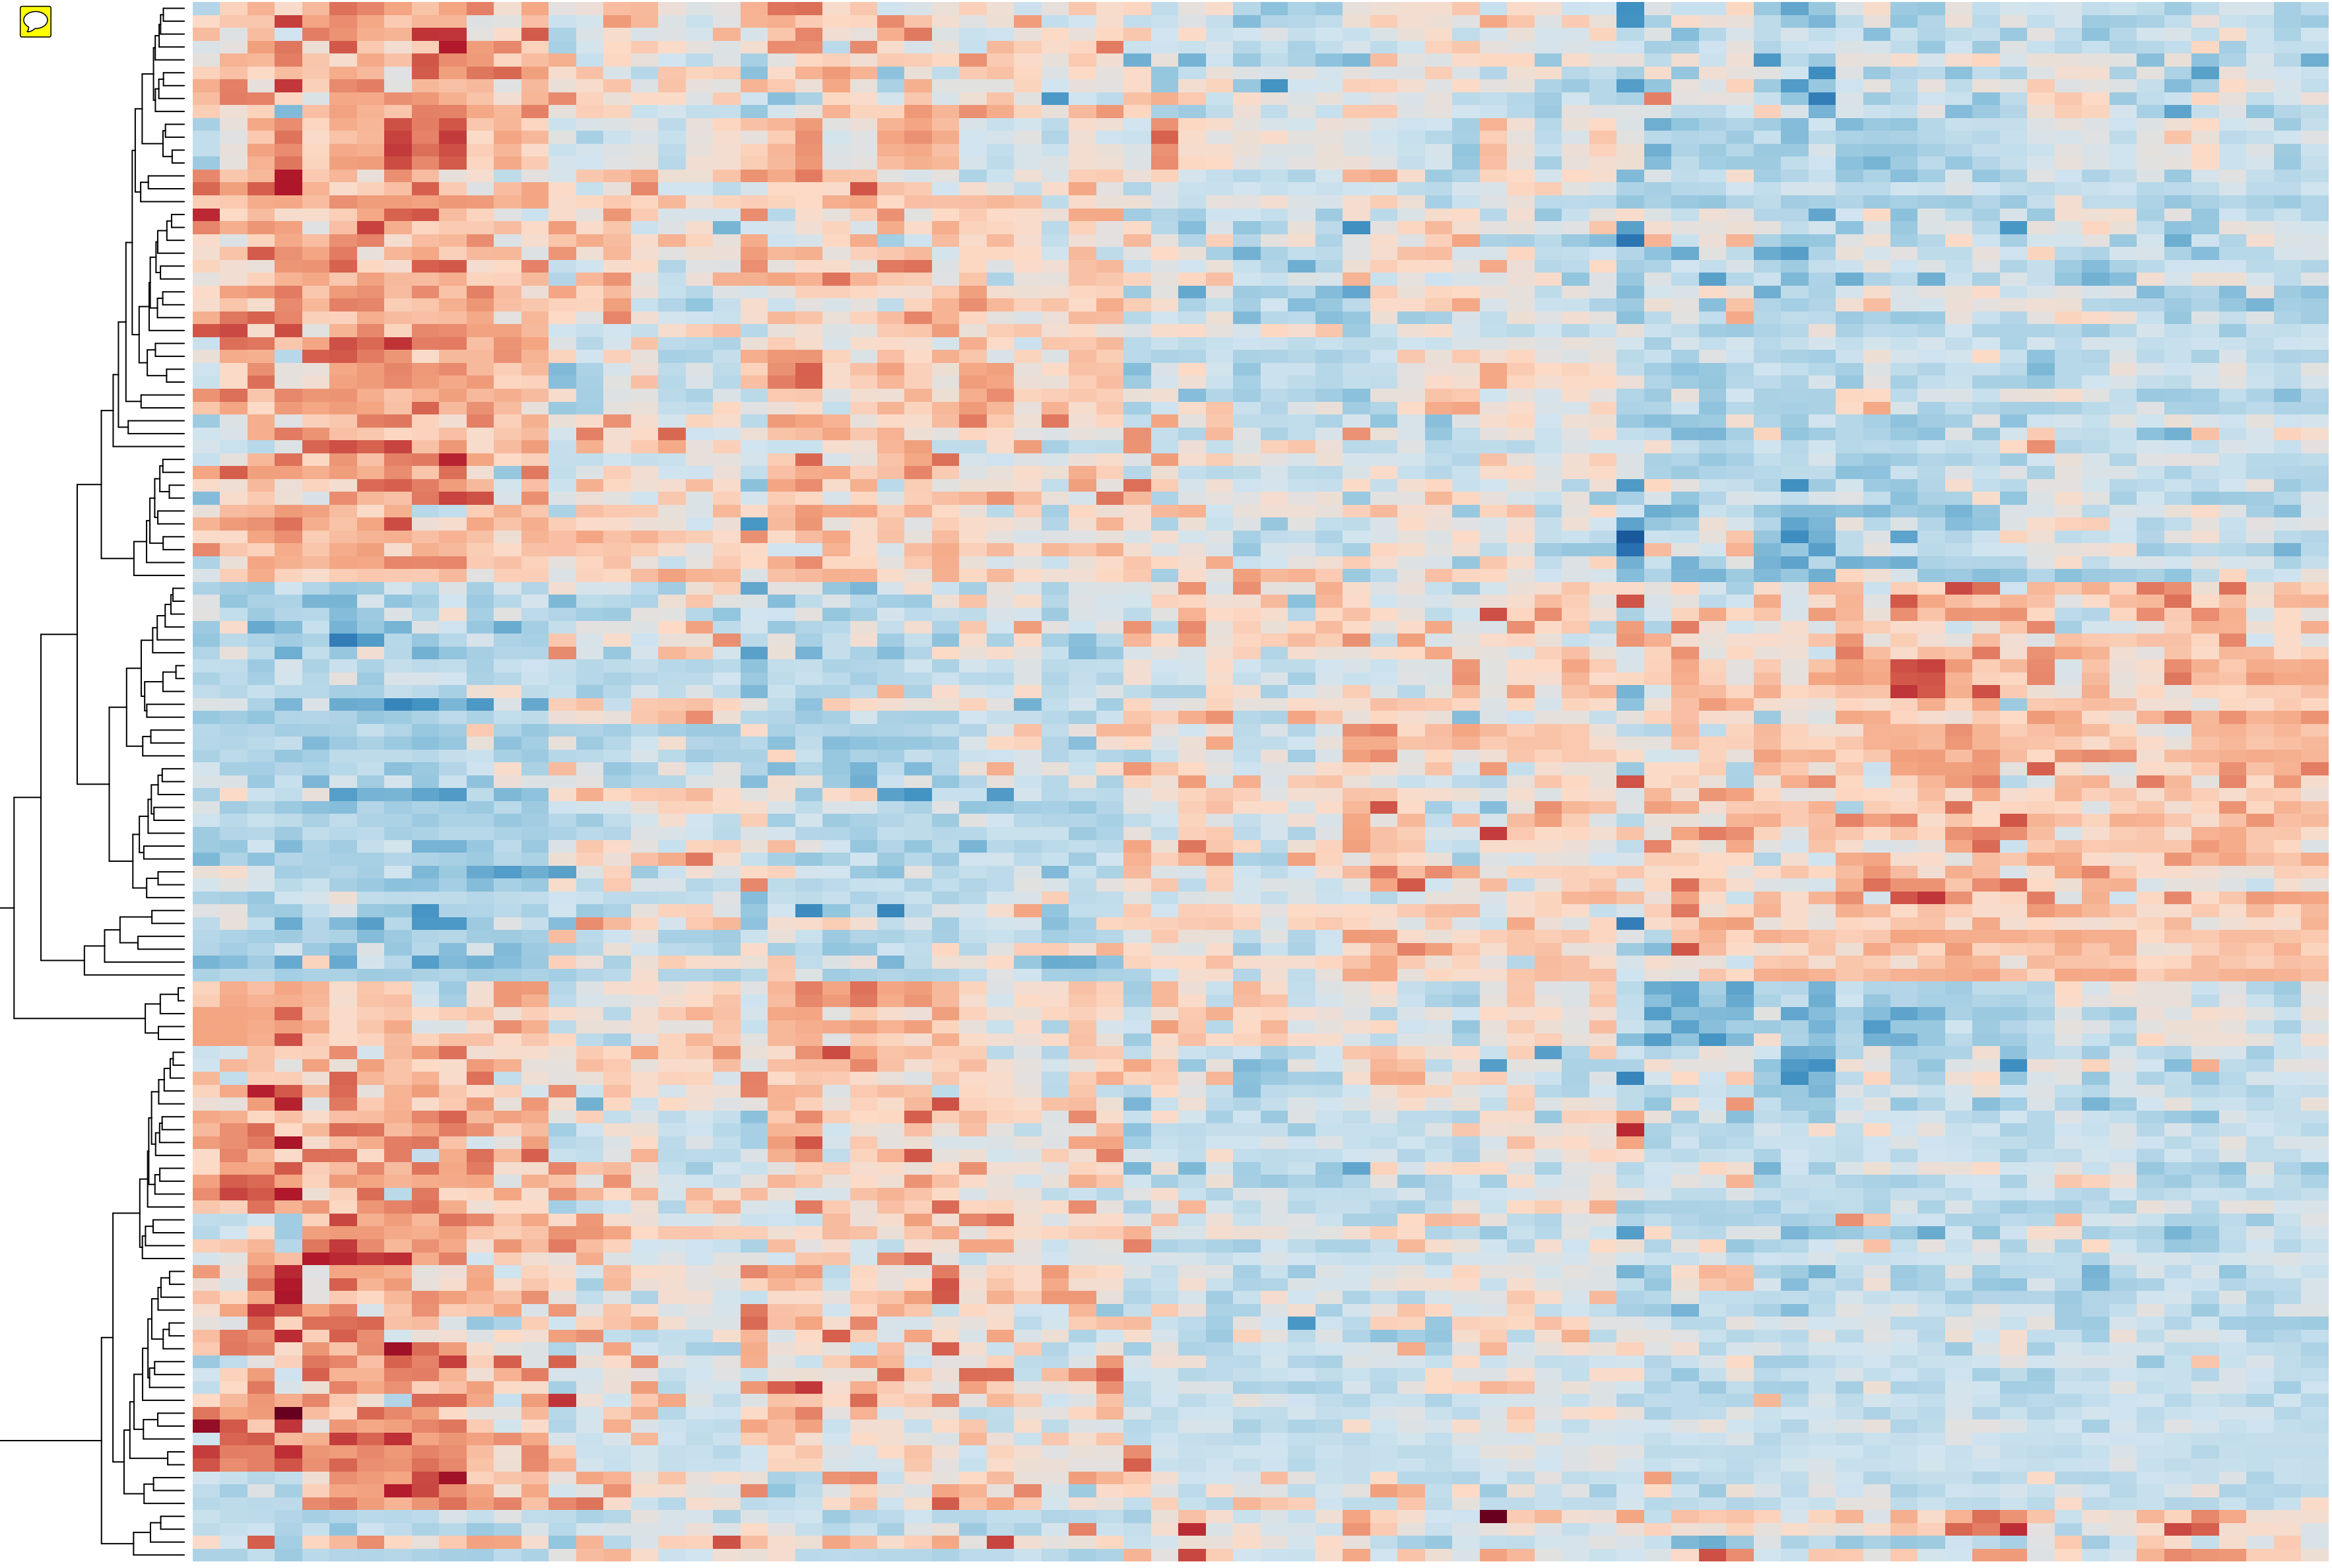

MFSD1  
RERE  
CYTH4  
SOD2  
GALNT1  
TNFRSF1A  
  
BCR  
LYL1  
CD44  
CD44  
CD44  
CD44  
PTPRE  
GSN  
HHEX  
LPIN2  
CDYL  
E2F3  
CD58  
SESN1  
ELF4  
GALNT1  
XYLT1  
PPP3CA  
JUP  
IGFBP7  
METTL7A  
LYN  
LYN  
LAT2  
CCND2  
LGALS1  
LMO2  
SPINK2  
CD44  
INPP5D  
ARHGAP1  
MBOAT7  
HLA-E  
GPX1  
LAPTM4A  
ZMIZ1  
CD44  
RNF130  
AQP3  
ABI2  
CHRNA3  
CACNB3  
SIT1  
AEBP1  
PTCRA  
PTCRA  
SLC29A1  
MYH10  
FXD2  
CR2  
NOTCH3  
CD1E  
PCBP3  
AQP3  
QXCT1  
NINL  
PTPN3  
CHRNA3  
AQP3  
FXD2  
FAM69A  
RAPGEF5  
PTCRA  
MZB1  
CDC25B  
CD1B  
  
MAL  
CD1E  
HLA-G  
HLA-G  
LAPTM5  
HLA-E  
LAPTM5  
SSH1  
MFSD5  
EP315  
CD58  
SMARCA2  
SIPA1  
BTK  
LILRA2  
SERPINB6  
GALNT1  
PPP3CA  
TSPAN13  
MBP  
MGLL  
IQGAP2  
BCL2  
HOPX  
SMARCA2  
SMARCA2  
SMARCA2  
CD58  
CCPG1  
HDAC9  
STAP1  
FDZD8  
MLC1  
LYN  
TNS3  
LILRA2  
ELK3  
IGFBP7  
MEF2C  
MEF2C  
MYCN  
TFPI  
HFD5  
CHRNA3  
PLCL1  
BNIP3  
ELOVL4



Figure S3

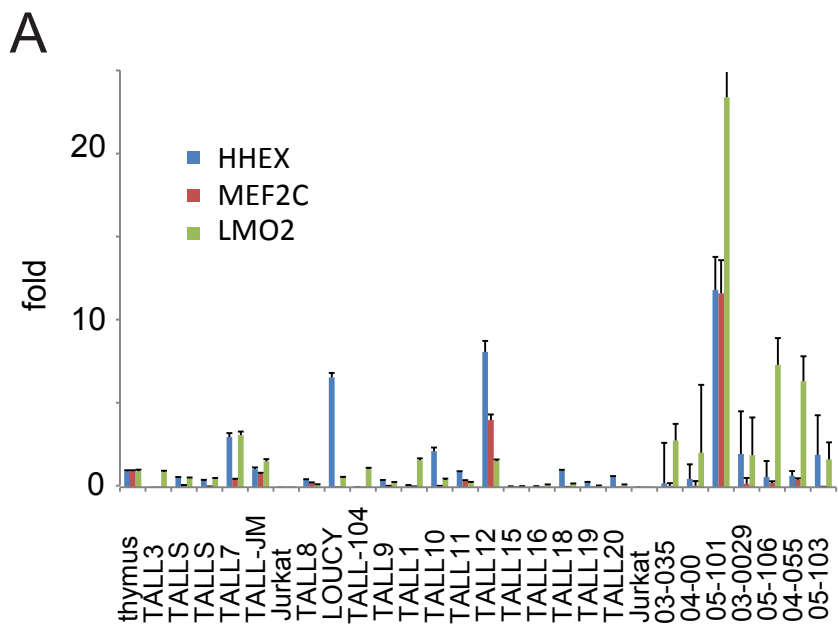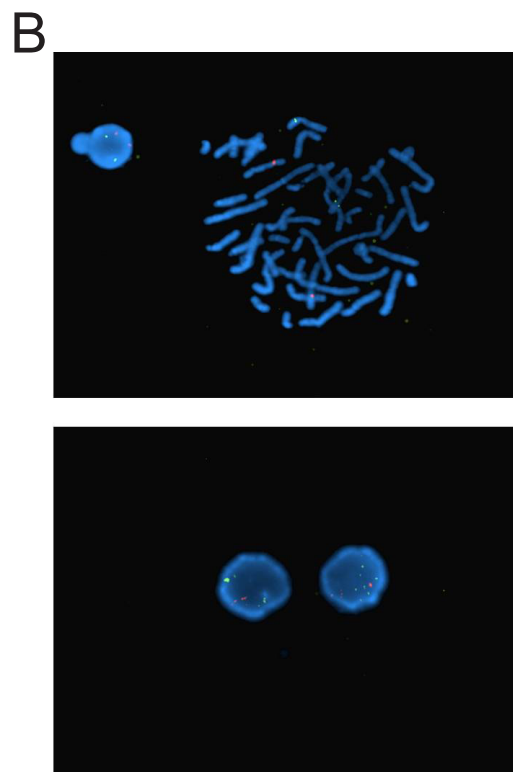

# Figure S4

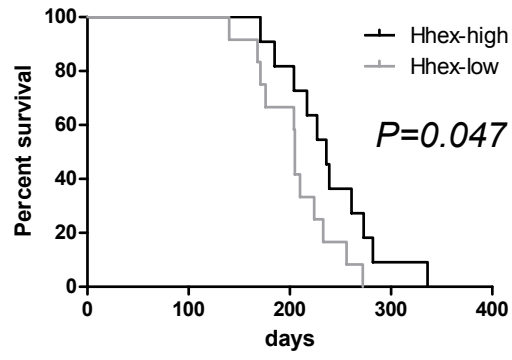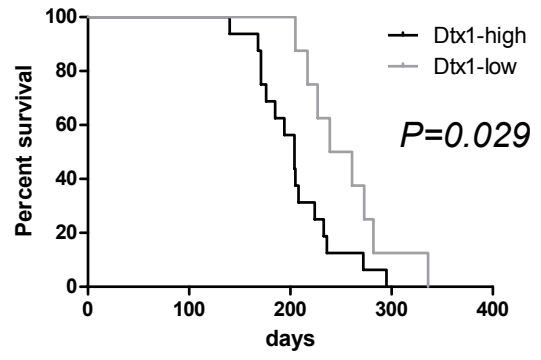

Figure S5

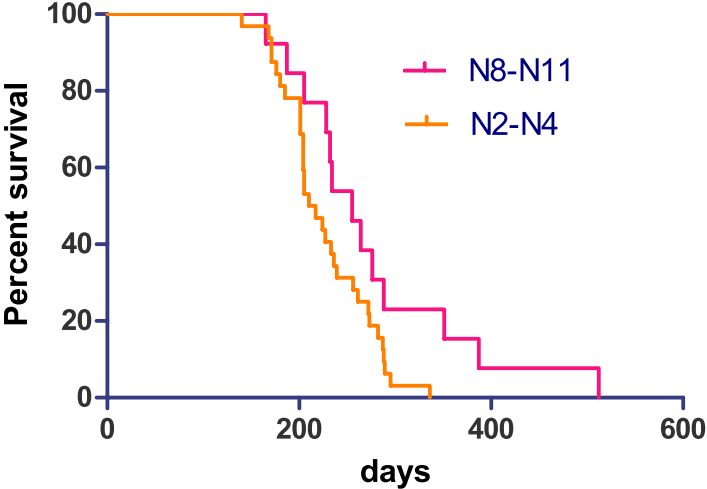

Figure S6

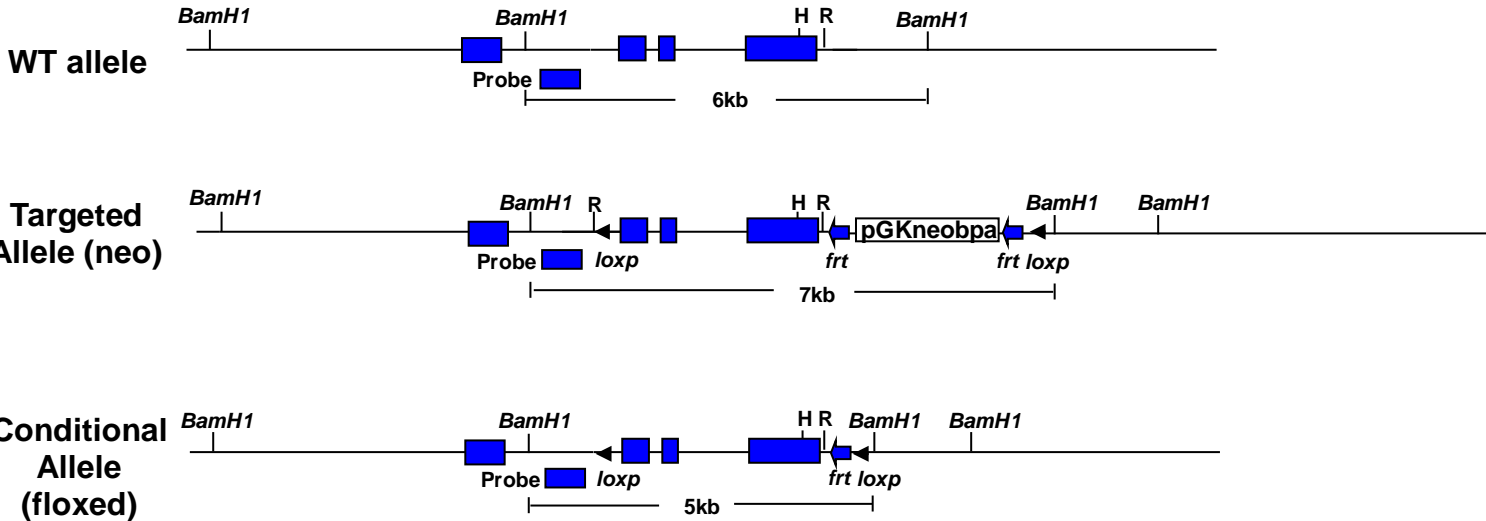

Figure S7

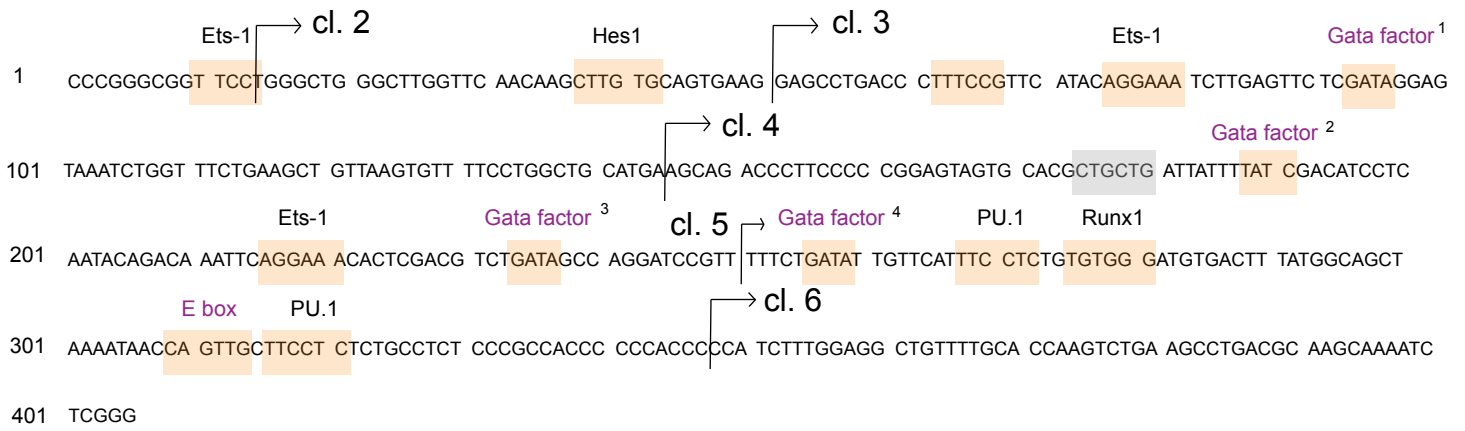

Figure S8

ChIP

LMO2  
GATA3  
TAL1  
TAL1  
WCE

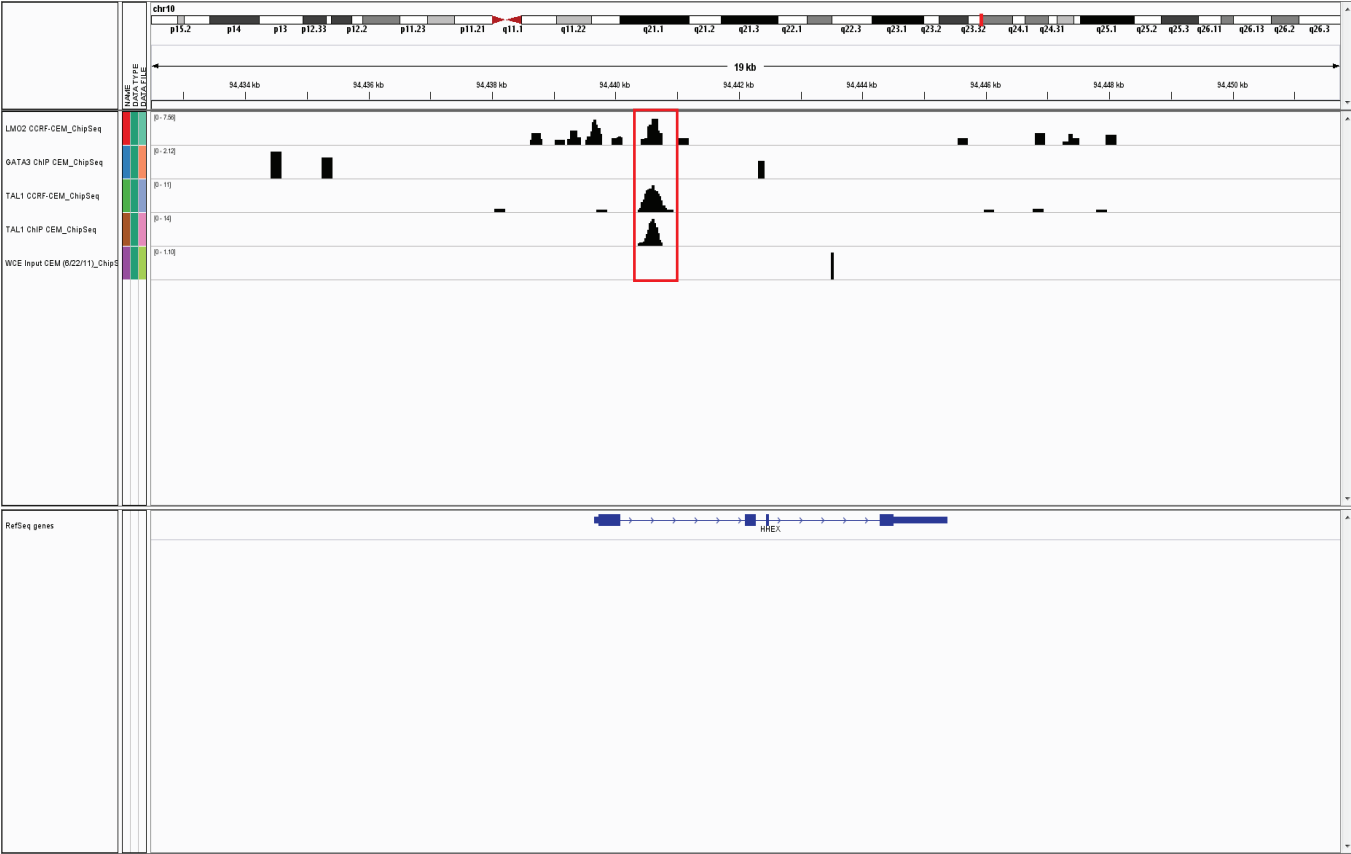

## References

1. Irizarry RA, Hobbs B, Collin F, et al. Exploration, normalization, and summaries of high density oligonucleotide array probe level data. *Biostatistics (Oxford, England)*. Apr 2003;4(2):249-264.
2. Smyth GK. Linear models and empirical bayes methods for assessing differential expression in microarray experiments. *Stat Appl Genet Mol Biol*. 2004;3:Article3.
3. Elliott NE, Cleveland S, Grann V, Janik JE, Dave UP. The Role of JAK3 mutations in Adult T-Cell Leukemia/Lymphoma. *ASH Annual Meeting Abstracts*. 2009;114(22):1940.
4. Weckx S, Del-Favero J, Rademakers R, et al. novoSNP, a novel computational tool for sequence variation discovery. *Genome Res*. Mar 2005;15(3):436-442.
5. Dignam JD, Lebovitz RM, Roeder RG. Accurate transcription initiation by RNA polymerase II in a soluble extract from isolated mammalian nuclei. *Nucleic Acids Res*. Mar 11 1983;11(5):1475-1489.
6. Cai Y, Xu Z, Xie J, et al. Eto2/MTG16 and MTGR1 are heteromeric corepressors of the TAL1/SCL transcription factor in murine erythroid progenitors. *Biochem Biophys Res Commun*. Dec 11 2009;390(2):295-301.
7. Liu P, Jenkins NA, Copeland NG. A highly efficient recombineering-based method for generating conditional knockout mutations. *Genome Res*. Mar 2003;13(3):476-484.
8. O'Neil J, Calvo J, McKenna K, et al. Activating Notch1 mutations in mouse models of T-ALL. *Blood*. Jan 15 2006;107(2):781-785.
